# Supplementary material for: Novel Antiviral Molecules against Ebola Virus Infection
Source: MDPI journal article supplement (doi:10.3390/ijms241914791), 2023-09-30
Supplement: s1 [file s1]

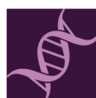

# Novel Antiviral Molecules against Ebola Virus Infection

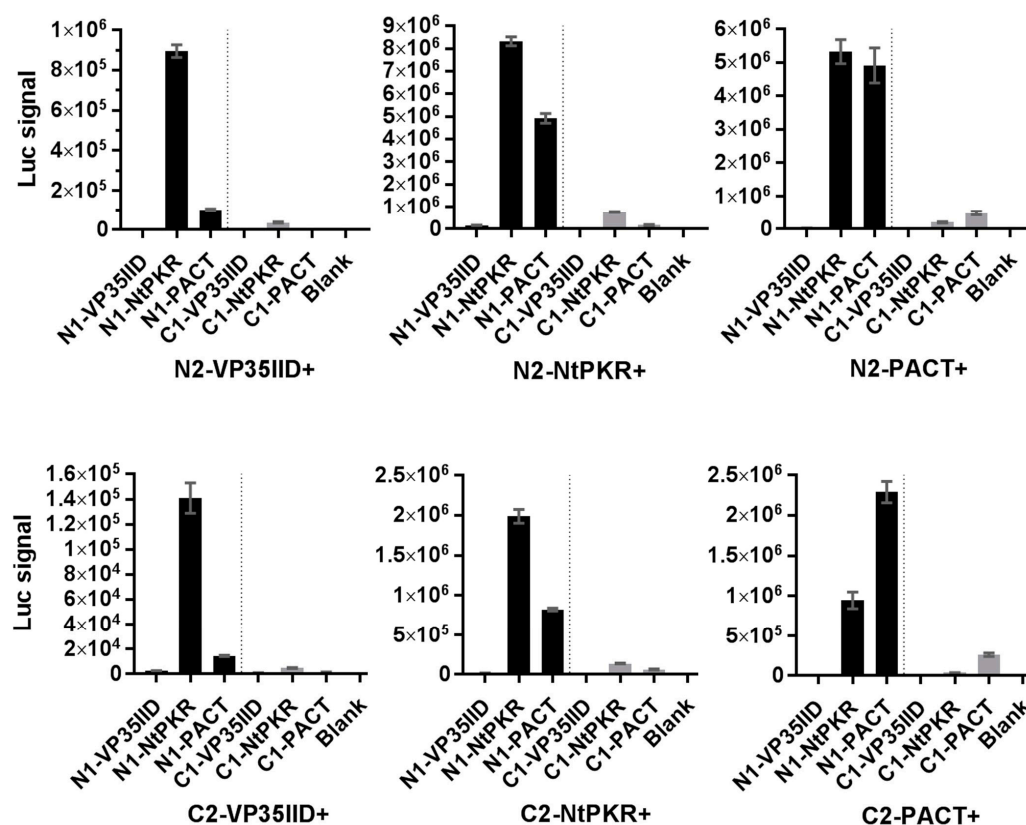

**Figure S1.** Interaction of VP35IID with NtPKR or PACT *in cellula*. NPCA of plasmids expressing the nanoluciferase N1 and N2 moieties fused to the N- or C-terminus of VP35IID, NtPKR or PACT in all possible combinations. Representative graphs are shown.

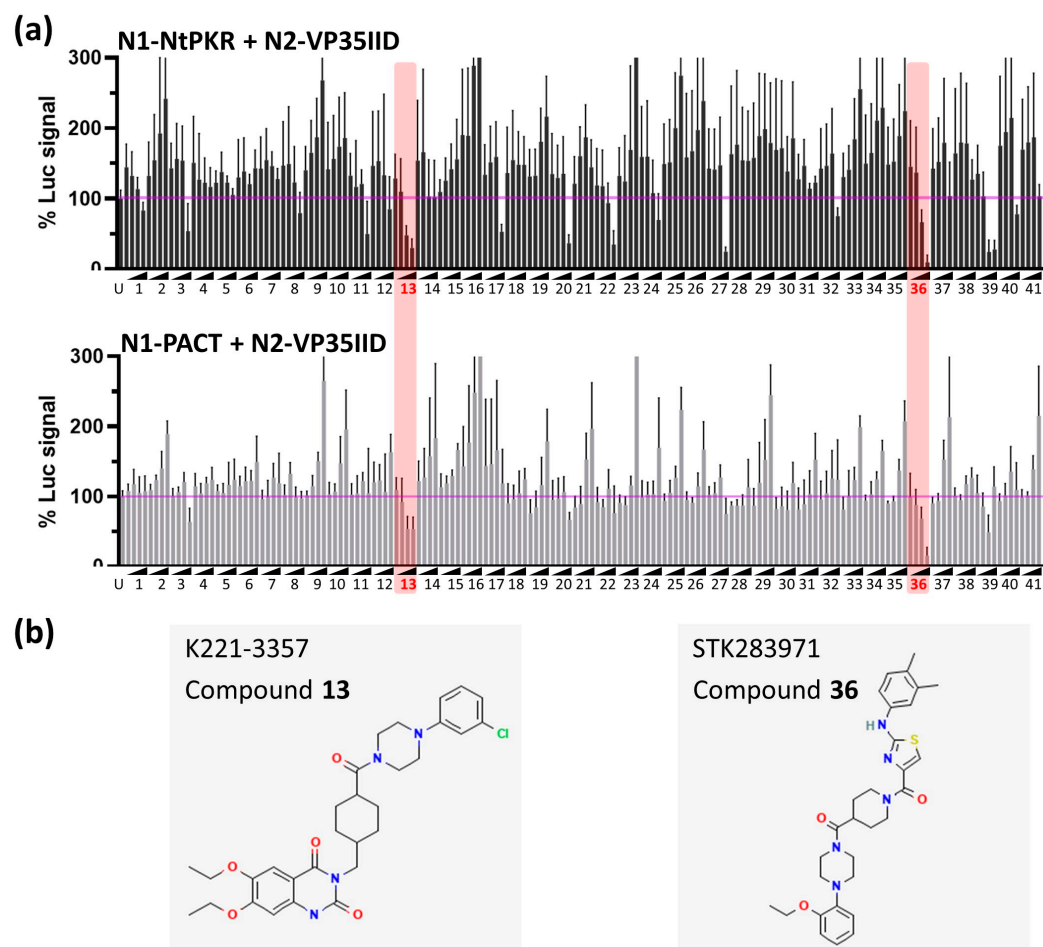

**Figure S2.** Highlights of compounds **13** and **36**. **(a)** Luciferase signal (measured for 100 ms) recorded 24 h after the 41 compounds at 1, 5, 10 and 20  $\mu$ M or equivalent concentrations of DMSO (not shown) were applied to HEK293T cells transfected with either the mix N1-NtPKR/N2-VP35IID (upper graph) or N1-PACT/N2-VP35IID (lower graph). U, untreated with DMSO or compounds used to normalize luciferase signals from three independent experiments in technical triplicates; the horizontal purple line indicates the 100% signal. **(b)** Chemical 2D structure of compounds **13** and **36**.

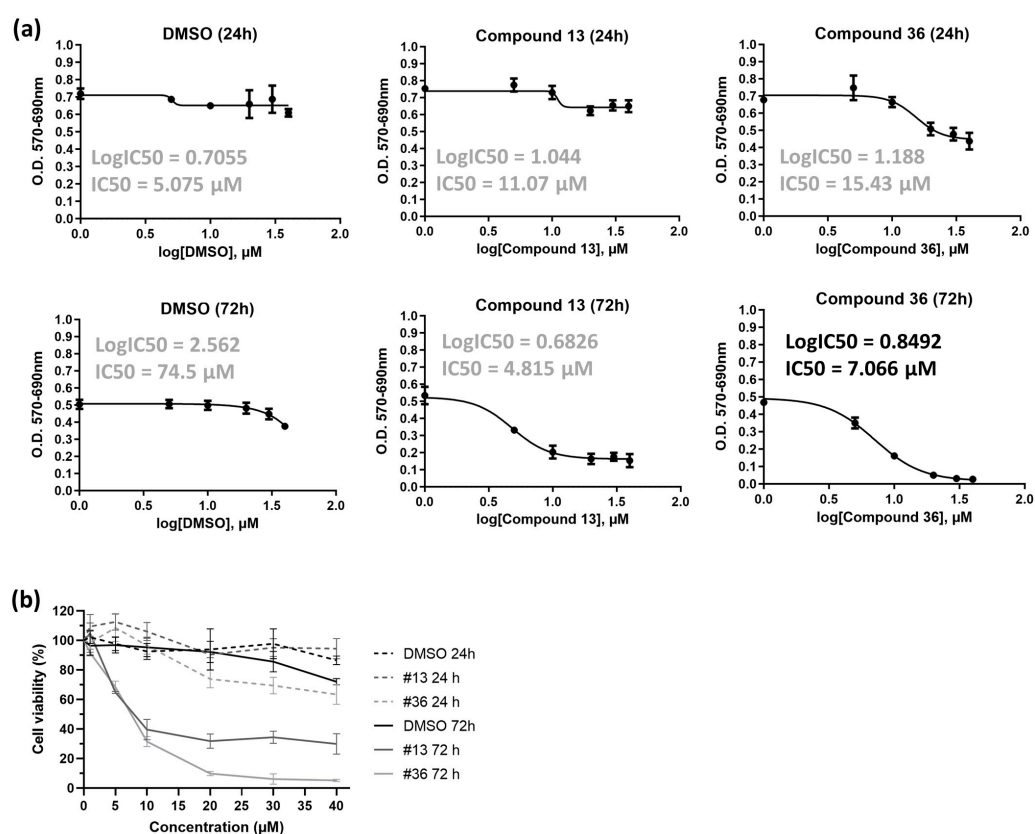

**Figure S3.** Compounds **13** and **36** additional cytotoxicity assessment in Huh7.25-CD81 cells. MTT assay was used to estimate IC<sub>50</sub> (a) and % of cell viability (b). Please, note that only IC<sub>50</sub> of compound **36** at 72 h post treatment may be correctly estimated since O.D. did not reach 0 in any other case even upon treatment at 40 μM for 72 h.

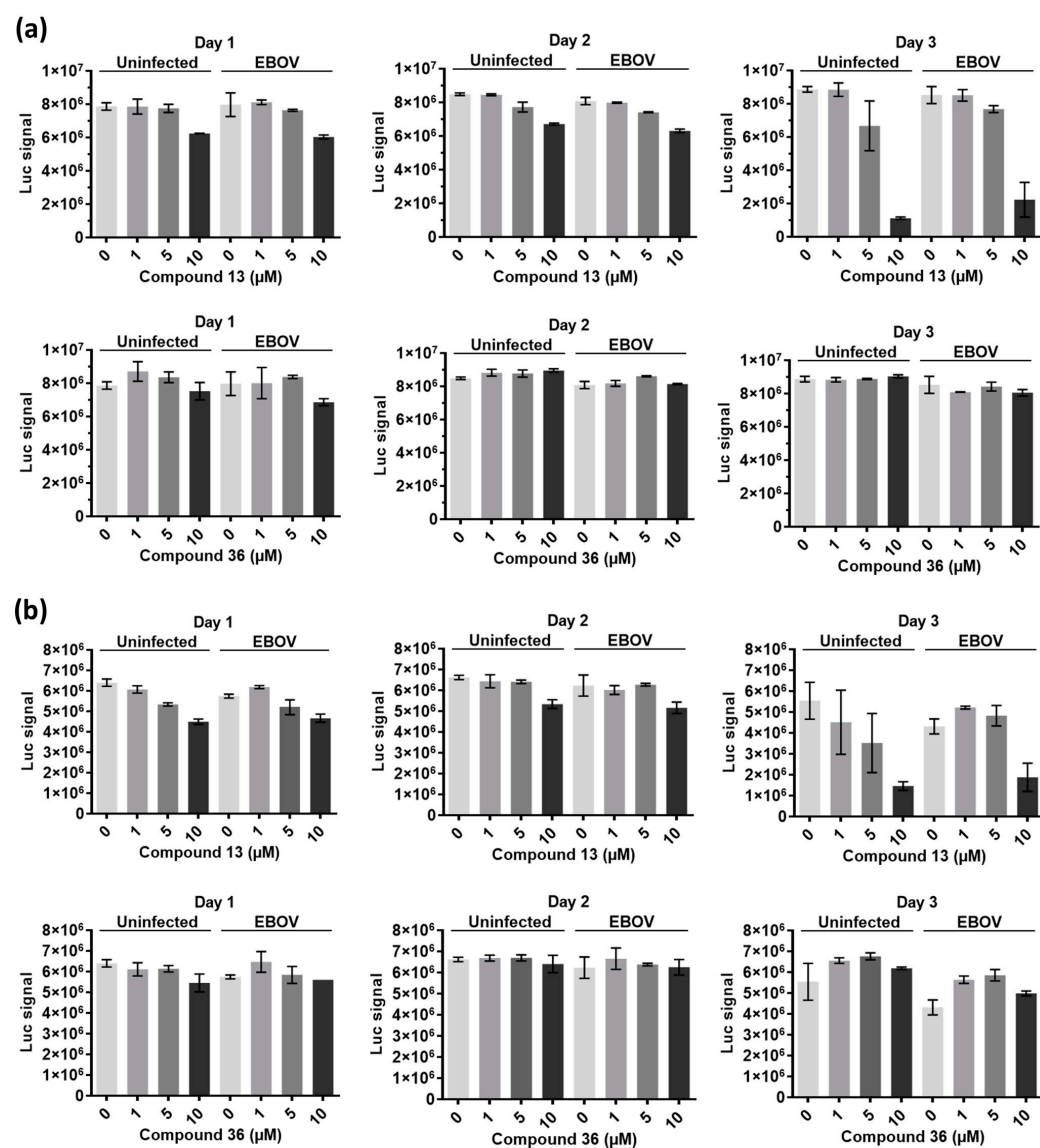

**Figure S4.** Cell viability assay corresponding to Figure 3. The viability of 293T cells (a) and Huh7 cells (b) treated with the compounds 13 or 36, with or without EBOV infection was quantified as luciferase signal (Luc signal) at 24, 48, and 72 h post-infection (Day1, Day 2, Day 3, respectively) using the CellTiter-Glo 2.0 assay (Promega, #G9681) following the manufacturer's instructions.

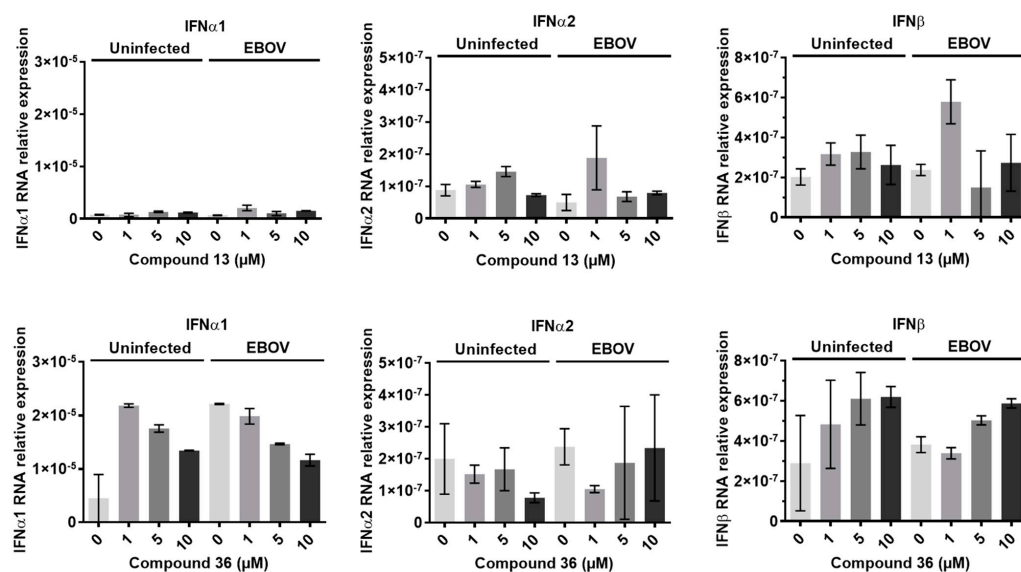

**Figure S5.** Effect of compounds 13 and 36 on IFN induction during EBOV infection. RNA extracted from EBOV-infected HEK293T (same samples as in Figure 3) were analyzed for expression of the two early (IFN $\beta$ , IFN $\alpha$ 1) and one late (IFN $\alpha$ 2) genes by RT-qPCR.

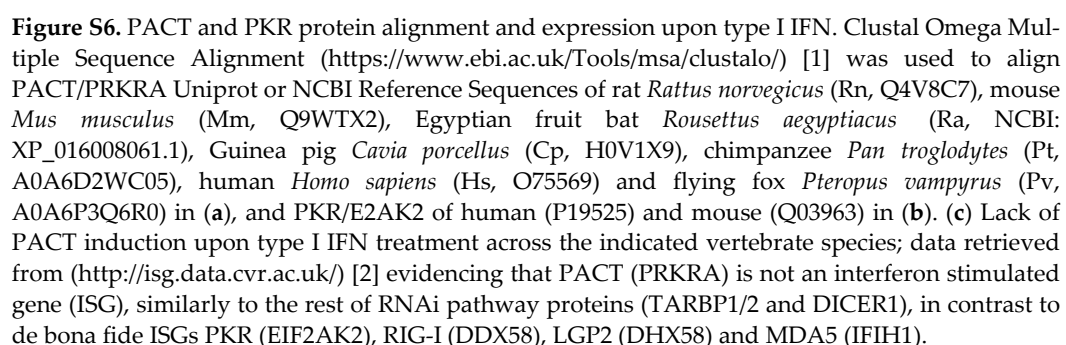

**Table S1.** Primers used in this study for cloning or for RTqPCR (in italics).

| Name                                 | Sequence (5'-3')                                                                 |
|--------------------------------------|----------------------------------------------------------------------------------|
| VP35F                                | GCGATCGCCATGGGAAAGCCCGACATTAGTGCTAAG                                             |
| VP35R                                | ACGCGTAATCTTCAGACCCAGGGTCTTGCC                                                   |
| VP35-B1                              | GGGGACAACCTTTGTACAAAAAAGTTGGCATGGGAAAGCCCGACATTAGTGCTAAG                         |
| VP35-B2N                             | GGGGACAACCTTTGTACAAGAAAGTTGGAATCTTCAGACCCAGGGTCTTGCCG                            |
| VP35-B2S                             | GGGGACAACCTTTGTACAAGAAAGTTGGTTAAATCTTCAGACCCAGGGTCTTGCCG                         |
| M1-F                                 | CCCTCCCTCCCCAGCCATCGACGCCGGCTGGGTCTGCG                                           |
| M1-R                                 | CGCAGACCCAGCCGGCGTCGATGGCTGGGGAGGGAGGG                                           |
| M2-F                                 | TGCCAGAAGTCCCTGGCCCCAGTCCCTCCCTC                                                 |
| M2-R                                 | GAGGGAGGGACTGGGGCCAGGGACTTCTGGCA                                                 |
| M3-F                                 | CTTTGGCACCGCCGCCACAGCTGGTGCAG                                                    |
| M3-R                                 | CTGCACCAGCTGGTGGGCGGCGGTGCCAAAG                                                  |
| M4-F                                 | GGCGACATCCCCGCGCTTGCCAGGCCTCCCTGCGACCAG                                          |
| M4-R                                 | CTGGTCGACGGGAGGCCTGGCAAGCGGCGGGGATGTCGCC                                         |
| M5-F                                 | CCAGGGCTTGCCAGGCCTCCCTGGCCCCAGTCCCTCCC                                           |
| M5-R                                 | GGGAGGGACTGGGGCCAGGGAGGCCTGGCAAGCCCTGG                                           |
| M6-F                                 | ACATCCCCGCGCTTGCCAGAAGTCCCTGGCCCCAGTCCC                                          |
| M6-R                                 | GGGACTGGGGCCAGGGACTTCTGGCAAGCGGCGGGGATGT                                         |
| FB_PKR1                              | GGGGACAACCTTTGTACAAAAAAGTTGGCATGGCTGGTGATCTTTCAGC<br>GGGGACAACCTTTGTACAAGAAAGTT- |
| RB_PKR1                              | GGTTATAAAGGACTAACTGCCTTCTTTTCCTTA                                                |
| FB_PKR2                              | GGGGACAACCTTTGTACAAAAAAGTTGGCTCTTCAGAAGGATTATCCATGGG                             |
| RB_PKR2                              | GGGGACAACCTTTGTACAAGAAAGTTGGTTAGTCAGATTTCAGTGAGGTTTCTTCT                         |
| FB_PACT1                             | GGGGACAACCTTTGTACAAAAAAGTTGGCATGATAACAGCTAAGCCAGGG                               |
| RB_PACT1                             | GGGGACAACCTTTGTACAAGAAAGTTGGTTAAACTGCAAAGCAAATACTTGCA                            |
| FB_PACT2                             | GGGGACAACCTTTGTACAAAAAAGTTGGCTCCAAGCAACCAAAGAACC                                 |
| RB_PACT2                             | GGGGACAACCTTTGTACAAGAAAGTTGGTTAAGAAATGTGGTTCTCTGGAGA                             |
| <i>IFN<math>\alpha</math>1-F</i>     | GTGGTGCTCAGCTGCAAGTC                                                             |
| <i>IFN<math>\alpha</math>1-R</i>     | TGTGGGTCTCAGGGAGATCAC                                                            |
| <i>IFN<math>\alpha</math>1 probe</i> | AGCTGCTCTCTGGGC (FAM)                                                            |
| <i>IFN<math>\alpha</math>2-F</i>     | CAGTCTAGCAGCATCTGCAACAT                                                          |
| <i>IFN<math>\alpha</math>2-R</i>     | GGAGGGCCACCAGTAAAGC                                                              |
| <i>IFN<math>\alpha</math>2 probe</i> | ACAATGGCCTTGACCTT (FAM)                                                          |
| <i>IFN<math>\beta</math>-F</i>       | TCTCCACGACAGCTCTTTCCA                                                            |
| <i>IFN<math>\beta</math>-R</i>       | AACTTGACAATTGCTGCTTCTTTG                                                         |
| <i>IFN<math>\beta</math>-probe</i>   | AACTTGCTTGGAATCCT (FAM)                                                          |
| <i>IFN<math>\beta</math>-F(MV)</i>   | AAGCAATTGTCCAGTCCCA                                                              |
| <i>IFN<math>\beta</math>-R(MV)</i>   | TGCATTACCTGAAGGCCAAG                                                             |
| <i>MV-F</i>                          | TCAGGCATACCCACTAGTGTGAA                                                          |
| <i>MV-R</i>                          | TGACAGATAGCGAGTCCATAACG                                                          |
| <i>GAPDH-F</i>                       | GGTCGGAGTCAACGGATTG                                                              |
| <i>GAPDH-R</i>                       | ACTCCACGACGTACTCAGCG                                                             |

1. Sievers, F.; Wilm, A.; Dineen, D.; Gibson, T.J.; Karplus, K.; Li, W.; Lopez, R.; McWilliam, H.; Remmert, M.; Soding, J.; et al. Fast, scalable generation of high-quality protein multiple sequence alignments using Clustal Omega. *Mol. Syst. Biol.* **2011**, *7*, 539. <https://doi.org/10.1038/msb.2011.75>.
2. Shaw, A.E.; Hughes, J.; Gu, Q.; Behdenna, A.; Singer, J.B.; Dennis, T.; Orton, R.J.; Varela, M.; Gifford, R.J.; Wilson, S.J.; et al. Fundamental properties of the mammalian innate immune system revealed by multispecies comparison of type I interferon responses. *PLoS Biol.* **2017**, *15*, e2004086. <https://doi.org/10.1371/journal.pbio.2004086>.
